# Supplementary material
Source: Springer Nature journal article supplement (https://www.springermedizin.de/resource/supplementary/13075_2013_3994_MOESM2_ESM.pdf/9695880)

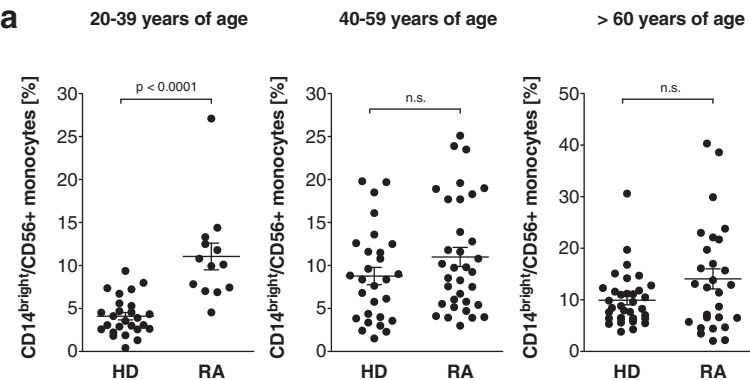

**b**

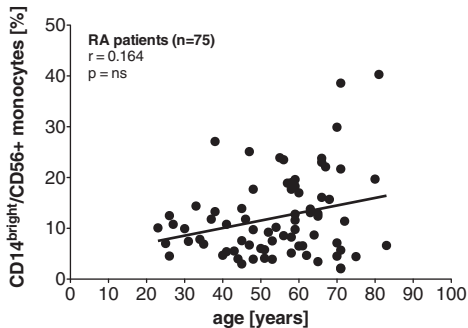

Supplement: MOESM2 [file 9695880]
